# Supplementary material
Source: HighWire-hosted journal article supplement (https://bmjopen.bmj.com/content/15/2/e088355)
Supplement: inline-supplementary-material-2 [file inline-supplementary-material-2.pdf]

Distribution plots and Kolmogorov-Smirnov test

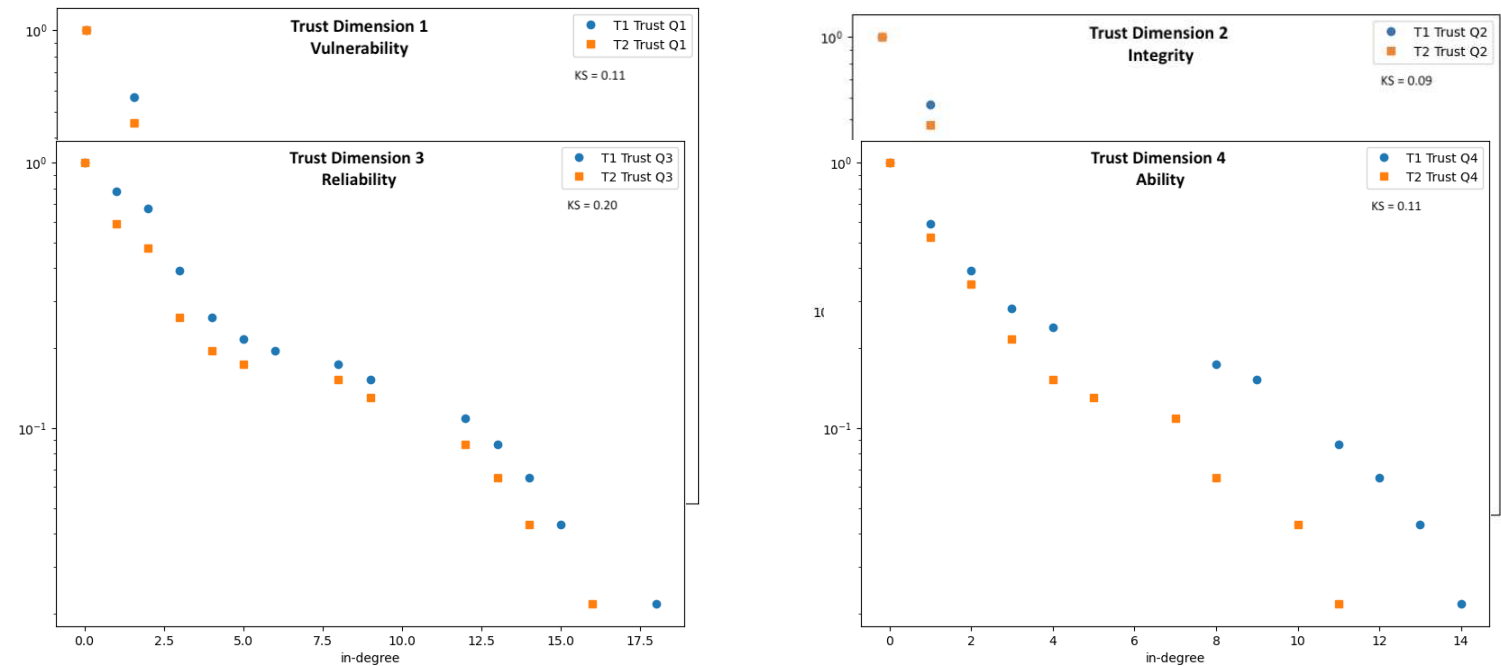

Distribution plots and Kolmogorov-Smirnov test

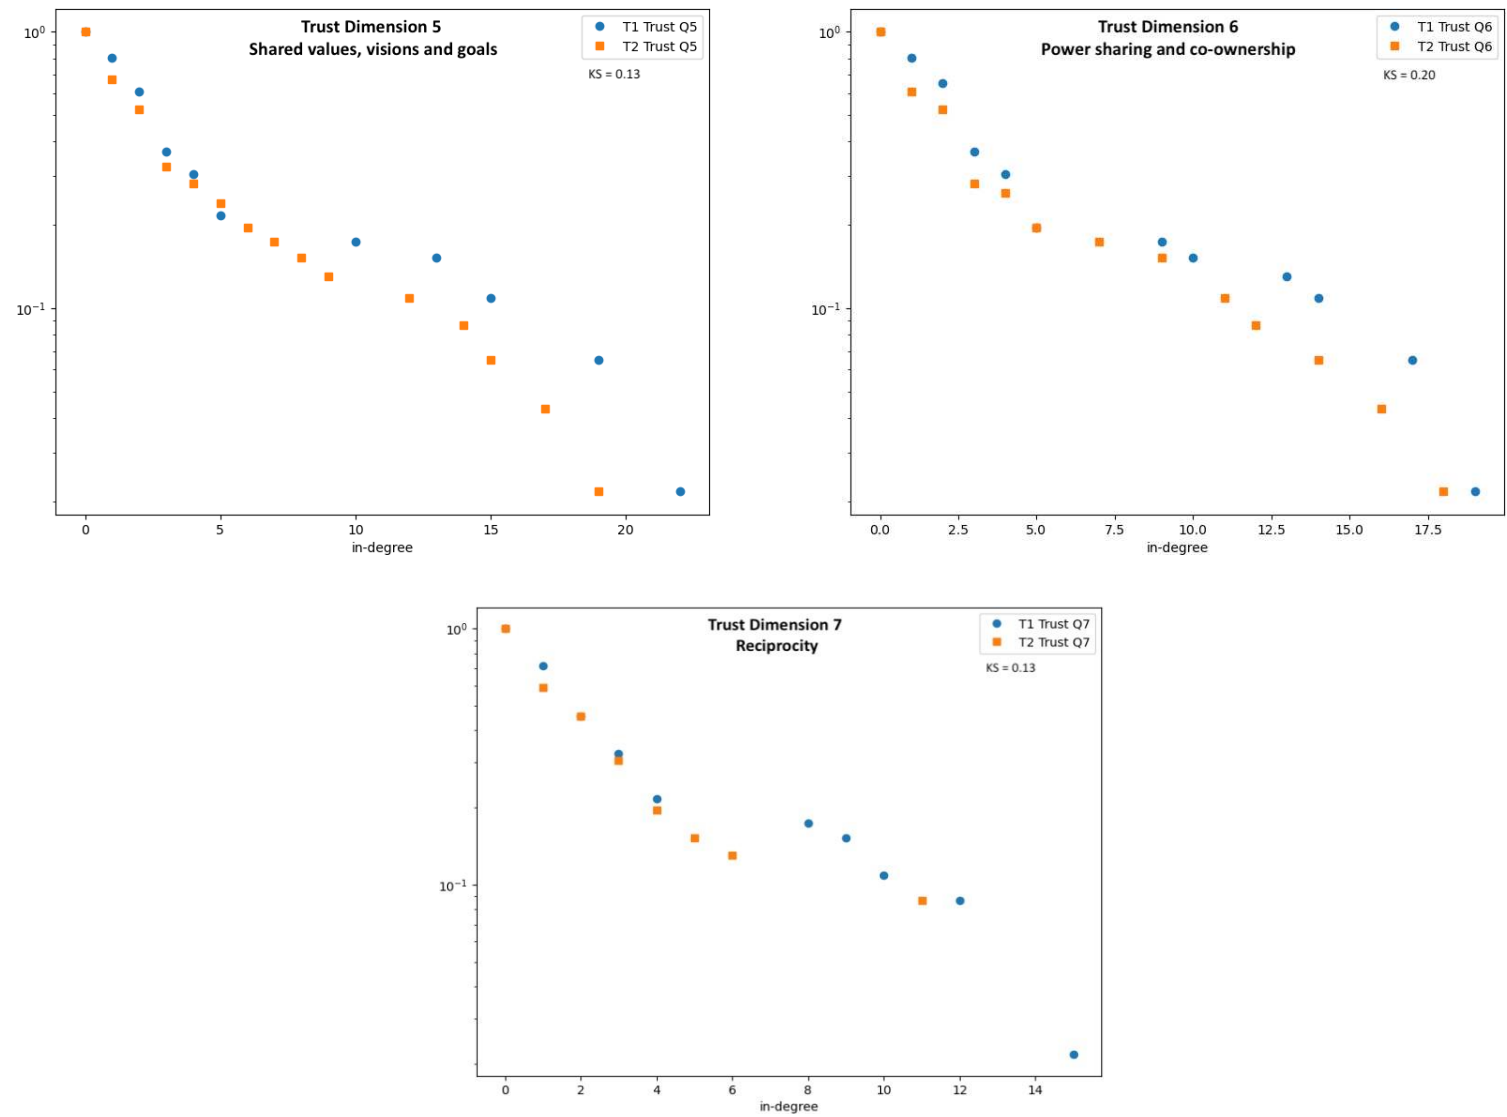

Distribution plots and Kolmogorov-Smirnov test
